# Supplementary material for: Further Evidence for Staphylococcal Food Poisoning Outbreaks Caused by egc-Encoded Enterotoxins
Source: Toxins (Basel). 2015 Mar 20;7(3):997–1004. doi: 10.3390/toxins7030997 (PMC4379538; doi:10.3390/toxins7030997)
Supplement: Supplementary file 1 [file toxins-07-00997-s001.xlsx]

## Sheet: Blatt1
Supplementary Information
Table S1. DNA microarray data.
Target Gene	Probe	Description	Ticino 2007	Ticino 2014
rrnD1 (S. aureus)	rrnD1 (S. aureus)	Domain 1 of 23S-rRNA	positive	positive
gapA	gapA	glyceraldehyde 3-phosphate dehydrogenase, locus 1	positive	positive
katA	katA	katalase A	positive	positive
coA	coA	coagulase	positive	positive
nuc1	nuc1	thermostable extracellular nuclease	positive	positive
spa	spa	staphylococcal protein A	positive	positive
sbi	sbi	IgG-binding protein	positive	positive
sarA	sarA	staphylococcal accessory regulator A	positive	positive
saeS	saeS	histidine protein kinase, sae locus	positive	positive
vraS	vraS	sensor protein	positive	positive
agrI (total)	agrI (total)	accessory gene regulator allele I	positive	negative
agrB-I	agrB-I		ambiguous	negative
agrC-I	agrC-I		positive	negative
agrD-I	agrD-I		positive	negative
agrII (total)	agrII (total)	accessory gene regulator allele II	negative	positive
agrB-II	agrB-II		negative	positive
agrC-II	agrC-II		negative	ambiguous
agrD-II	agrD-II		negative	positive
agrIII (total)	agrIII (total)	accessory gene regulator allele III	negative	negative
agrB-III	agrB-III		negative	negative
agrC-III	agrC-III		negative	negative
agrD-III	agrD-III		negative	negative
agrIV (total)	agrIV (total)	accessory gene regulator allele IV	negative	negative
agrB-IV	agrB-IV		negative	negative
agrC-IV	agrC-IV		negative	negative
hld	hld	haemolysin delta	positive	positive
mecA	mecA	alternate penicillin binding protein 2, defining MRSA	negative	negative
mecC	mecC	novel mecA homologue, also associated with beta lactam resistance	not tested	negative
delta_mecR	delta_mecR	truncated signal transducer protein MecR1	negative	negative
ugpQ	ugpQ	glycerophosphoryl diester phosphodiesterase, associated with mecA	negative	negative
ccrA-1	ccrA-1	cassette chromosome recombinase genes A-1	negative	negative
ccrB-1	ccrB-1	cassette chromosome recombinase genes B-1	negative	negative
plsSCC (COL)	plsSCC (COL)	plasmin-sensitive surface protein	negative	negative
Q9XB68-dcs	Q9XB68-dcs	hypothetical protein from SCCmec elements	negative	negative
ccrA-2	ccrA-2	cassette chromosome recombinase gene A-2	negative	negative
ccrB-2	ccrB-2	cassette chromosome recombinase gene B-2	negative	negative
kdpA-SCC	kdpA-SCC	potassium-translocating ATPase A, chain 2	negative	negative
kdpB-SCC	kdpB-SCC	potassium-transporting ATPase B, chain 1	negative	negative
kdpC-SCC	kdpC-SCC	potassium-translocating ATPase C, chain 2	negative	negative
kdpD-SCC	kdpD-SCC	sensor kinase protein	negative	negative
kdpE-SCC	kdpE-SCC	KDP operon transcriptional regulatory protein	negative	negative
mecI	mecI	methicillin-resistance gene regulatory protein	negative	negative
mecR	mecR	signal transducer protein MecR1	negative	negative
xylR	xylR	homolog of xylose repressor, associated with SCCmec-elements	negative	negative
ccrA-3	ccrA-3	cassette chromosome recombinase gene A-3	negative	negative
ccrB-3	ccrB-3	cassette chromosome recombinase gene B-3	negative	negative
merA	merA	mercury resistance gene operon, Hg(II) reductase	negative	negative
merB	merB	mercury resistance gene operon, alkylmercury lyase	negative	negative
ccrAA (MRSAZH47)_probe 1	ccrAA (MRSAZH47)_probe 1		negative	negative
ccrAA (MRSAZH47)_probe 2	ccrAA (MRSAZH47)_probe 2		negative	negative
ccrC (85-2082)	ccrC (85-2082)	cassette chromosome recombinase gene C	negative	negative
ccrA-4	ccrA-4	cassette chromosome recombinase gene A-4	negative	negative
ccrB-4	ccrB-4	cassette chromosome recombinase gene B-4	negative	negative
blaZ	blaZ	beta-lactamase	positive	negative
blaI	blaI	beta lactamase repressor (inhibitor)	positive	negative
blaR	blaR	beta-lactamase regulatory protein	positive	negative
erm(A)	erm(A)	macrolide/clindamycin resistance gene	negative	negative
erm(B)	erm(B)	macrolide/clindamycin resistance gene	negative	negative
erm(C)	erm(C)	macrolide/clindamycin resistance gene	negative	negative
lnu(A)	lnu(A)	lincosamid resistance gene (=linA)	negative	negative
msr(A)	msr(A)	macrolide resistance gene	negative	negative
mef(A)	mef(A)	macrolide resistance gene	negative	negative
mph(C)	mph(C)	macrolide resistance gene (=mpbBM)	negative	negative
vat(A)	vat(A)	virginiamycin-A-resistance gene	negative	negative
vat(B)	vat(B)	streptogramin-A-resistance gene	negative	negative
vga(A)	vga(A)	resistance gene to streptogramin A, lincosamide, pleuromutilin	negative	negative
vga(A) (BM 3327)	vga(A) (BM 3327)	resistance gene to streptogramin A (allele from strain BM 3327)	negative	negative
vgB(A)	vgB(A)	virginiamycin-B/pristinamycin-resistance gene	negative	negative
aacA-aphD	aacA-aphD	gentamicin/tobramycin resistance gene	negative	negative
aadD	aadD	tobramycin resistance gene	negative	negative
aphA3	aphA3	neo-/ kanamycin resistance gene	negative	negative
sat	sat	streptothricin resistance gene	negative	negative
dfrS1	dfrS1	trimethoprim resistance gene (=dfrA)	negative	negative
far1	far1	fusidic acid resistance gene (= fusB)	negative	negative
Q6GD50	Q6GD50	hypothetical protein associated with fusidic acid resistance (= fusC)	negative	negative
mupA	mupA	mupirocin resistance gene (=mupR)	negative	negative
tet(K)	tet(K)	tetracycline resistance gene	negative	negative
tet(M)	tet(M)	tetracycline resistance gene	negative	negative
cat (total)	cat (total)	chloramphenicol resistance gene	negative	negative
cat (pC221)	cat (pC221)		negative	negative
cat (pc223)	cat (pc223)		negative	negative
cat (pMC524)	cat (pMC524)		negative	negative
cat (pSBK203R)	cat (pSBK203R)		negative	negative
cfr	cfr	23S rRNA methyltransferase, resistance gene to phenicols, lincosamides, oxazolidinones (linezolid), pleuromutilins, streptogramin A	negative	negative
fexA	fexA	chloramphenicol/florfenicol resistance gene	negative	negative
fosB	fosB	metallothiol transferase	negative	negative
fosB (plasmid)	fosB (plasmid)		positive	positive
qacA	qacA	quaternary ammonium compound resistance gene protein A	negative	negative
qacC (total)	qacC (total)	quaternary ammonium compound resistance gene protein C	negative	negative
qacC (consensus)	qacC (consensus)		negative	negative
qacC (equine)	qacC (equine)		negative	negative
qacC (SA5)	qacC (SA5)		negative	negative
qacC (Ssap)	qacC (Ssap)		negative	negative
qacC (ST94)	qacC (ST94)		negative	negative
sdrM	sdrM	putative transport protein (=tetEfflux)	positive	positive
vanA	vanA	vancomycin resistance gene	negative	negative
vanB	vanB	vancomycin resistance gene from enterococci and Clostridium	negative	negative
vanZ	vanZ	teicoplanin resistance gene from enterococci	negative	negative
tst1 (consensus)	tst1 (consensus)	toxic shock syndrome toxin 1	negative	negative
tst1 ("human" allele)	tst1 ("human" allele)		negative	negative
tst1 ("bovine" allele, from RF122)	tst1 ("bovine" allele, from RF122)		negative	negative
sea	sea	enterotoxin A (=entA)	negative	negative
sea (320E)	sea (320E)	enterotoxin A, allele from strain 320E	negative	negative
sep	sea (N315)	enterotoxin A, allele from strain N315 = enterotoxin P	negative	negative
seb	seb	enterotoxin B (=entB)	negative	negative
sec	sec	enterotoxin C (=entC)	negative	negative
sed	sed	enterotoxin D (=entD)	negative	negative
see	see	enterotoxin E (=entF)	negative	negative
seg	seg	enterotoxin G (=entG)	positive	positive
seh	seh	enterotoxin H (=entH)	negative	negative
sei	sei	enterotoxin I (=entI)	positive	positive
sej	sej	enterotoxin J (=entJ)	negative	negative
sek	sek	enterotoxin K (=entK)	negative	negative
sel	sel	enterotoxin L (=entL)	negative	negative
sem	selm	enterotoxin-like gene/protein M (=sem, entM)	positive	positive
sen (consensus)	seln (consensus)	enterotoxin-like gene/protein N (=sen, entN), consensus probe	positive	positive
sen (other than RF122)	seln (other than RF122)		positive	positive
seo	selo	enterotoxin-like gene/protein O (=seo, entO)	positive	positive
egc enterotoxin gene cluster	egc enterotoxin gene cluster	enterotoxin gene cluster consisting of seg, sei, selm, seln, selo, selu	positive	positive
seq	seq	enterotoxin Q (=entQ)	negative	negative
ser	ser	enterotoxin R (=entR)	negative	negative
selu	selu	enterotoxin-like gene/protein U (=seu, entU)	positive	positive
ORF CM14_ probe1	ORF CM14_ probe1	enterotoxin-like protein ORF CM14	negative	negative
ORF CM14_ probe2	ORF CM14_ probe2	enterotoxin-like protein ORF CM14	negative	negative
lukF	lukF	haemolysin gamma / leukocidin, component B (F)	positive	positive
lukS	lukS	haemolysin gamma / leukocidin, component C (S)	negative	positive
lukS (ST22+ST45)	lukS (ST22+ST45)	haemolysin gamma / leukocidin, component C (S), allele from ST22 and ST45	positive	negative
hlgA	hlgA	haemolysin gamma, component A	positive	positive
lukF-PV	lukF-PV	Panton Valentine leukocidin F component	negative	negative
lukS-PV	lukS-PV	Panton Valentine leukocidin S component	negative	negative
lukF-PV (P83)	lukF-PV (P83)	F component of leukocidin from ruminants	negative	negative
lukM	lukM	S component of leukocidin from ruminants	negative	negative
lukD	lukD	leukocidin D component	negative	negative
lukE	lukE	leukocidin E component	negative	negative
lukX	lukX	leukocidin/ haemolysin toxin family protein	positive	ambiguous
lukY	lukY	leukocidin/haemolysin toxin family protein, allele from ST30 and ST45	negative	positive
lukY (ST30+ST45)	lukY (ST30+ST45)	leukocidin/haemolysin toxin family protein	positive	negative
hl	hl	putative membrane protein	positive	positive
hla	hla	haemolysin alpha	positive	positive
hlIII (consensus)	hlIII (consensus)	putative membrane protein	positive	positive
hlIII (other than RF122)	hlIII (other than RF122)		negative	positive
hlb_probe 1	hlb_probe 1	haemolysin beta	negative	positive
hlb_probe 2	hlb_probe 2	haemolysin beta	negative	positive
hlb_probe 3	hlb_probe 3	haemolysin beta	negative	positive
un-disrupted hlb	un-disrupted hlb	haemolysin beta without phage insertion	negative	positive
sak	sak	staphylokinase	positive	negative
chp	chp	chemotaxis-inhibiting protein (CHIPS)	positive	negative
scn	scn	staphylococcal complement inhibitor	positive	negative
etA	etA	exfoliative toxin serotype A	negative	negative
etB	etB	exfoliative toxin serotype B	negative	negative
etD	etD	exfoliative toxin D	negative	negative
edinA	edinA	epidermal cell differentiation inhibitor	negative	negative
edinB	edinB	epidermal cell differentiation inhibitor B	negative	negative
edinC	edinC	epidermal cell differentiation inhibitor C	negative	negative
ACME cluster	ACME cluster	Arginine Catabolic Mobile Element	negative	negative
arcA-SCC	arcA-SCC	ACME-locus: arginine deiminase	negative	negative
arcB-SCC	arcB-SCC	ACME-locus: ornithincarbamoyltransferase	negative	negative
arcC-SCC	arcC-SCC	ACME-locus: carbamatkinase	negative	negative
arcD-SCC	arcD-SCC	ACME-locus: arginine/ornithine-antiporter	negative	negative
aur (consensus)	aur (consensus)	aureolysin	ambiguous	negative
aur (other than MRSA252)	aur (other than MRSA252)		negative	positive
aur (MRSA252)	aur (MRSA252)		positive	negative
splA	splA	serinprotease A	negative	negative
splB	splB	serinprotease B	negative	negative
splE	splE	serinprotease E	negative	negative
sspA	sspA	glutamylendopeptidase	positive	positive
sspB	sspB	staphopain B, protease	positive	positive
sspP (consensus)	sspP (consensus)	staphopain A (staphylopain A), protease	positive	positive
sspP (other than ST93)	sspP (other than ST93)		positive	positive
setC/selx	setC/selx	staphylococcal exotoxin-like protein/SAg gene homolog, SAUSA300_0370	negative	positive
ssl01/set6_probe1_11	ssl01/set6_probe1_11	staphylococcal superantigen-like protein 1 (probes)	negative	negative
ssl01/set6_probe2_11	ssl01/set6_probe2_11		positive	ambiguous
ssl01/set6_probe1_12	ssl01/set6_probe1_12		negative	negative
ssl01/set6_probe2_12	ssl01/set6_probe2_12		negative	positive
ssl01/set6_probe4_11	ssl01/set6_probe4_11		negative	negative
ssl01/set6_probeRF122	ssl01/set6_probeRF122		negative	positive
ssl01/set6 (COL)	ssl01/set6 (COL)	staphylococcal superantigen-like protein 1 (interpretation/alleles)	negative	negative
ssl01/set6 (Mu50+N315)	ssl01/set6 (Mu50+N315)		negative	negative
ssl01/set6 (MW2+MSSA476)	ssl01/set6 (MW2+MSSA476)		negative	negative
ssl01/set6 (MRSA252)	ssl01/set6 (MRSA252)		negative	negative
ssl01/set6 (RF122)	ssl01/set6 (RF122)		negative	negative
ssl01/set6 (other alleles)	ssl01/set6 (other alleles)		negative	negative
ssl02/set7	ssl02/set7	staphylococcal superantigen-like protein 2	negative	positive
ssl02/set7 (MRSA252)	ssl02/set7 (MRSA252)		positive	negative
ssl03/set8_probe 1	ssl03/set8_probe 1	staphylococcal superantigen-like protein 3	negative	positive
ssl03/set8_probe 2	ssl03/set8_probe 2		negative	positive
ssl03/set8 (MRSA252, SAR0424)	ssl03/set8 (MRSA252, SAR0424)		negative	negative
ssl04/set9	ssl04/set9	staphylococcal superantigen-like protein 4	negative	positive
ssl04/set9 (MRSA252, SAR0425)	ssl04/set9 (MRSA252, SAR0425)		positive	negative
ssl05/set3_probe 1	ssl05/set3_probe 1	staphylococcal superantigen-like protein 5	negative	negative
ssl05/set3 (RF122, probe-611)	ssl05/set3 (RF122, probe-611)		negative	negative
ssl05/set3_probe 2 (612)	ssl05/set3_probe 2 (612)		negative	positive
ssl05/set3 (MRSA252)	ssl05/set3 (MRSA252)		positive	negative
ssl06/set21	ssl06/set21	staphylococcal superantigen-like protein 6	negative	positive
ssl06 (NCTC8325+MW2)	ssl06 (NCTC8325+MW2)		negative	positive
ssl07/set1	ssl07/set1	staphylococcal superantigen-like protein 7	negative	positive
ssl07/set1 (MRSA252)	ssl07/set1 (MRSA252)		negative	ambiguous
ssl07/set1 (AF188836)	ssl07/set1 (AF188836)		positive	negative
ssl08/set12_probe 1	ssl08/set12_probe 1	staphylococcal superantigen-like protein 8	negative	positive
ssl08/set12_probe 2	ssl08/set12_probe 2		negative	positive
ssl09/set5_probe 1	ssl09/set5_probe 1	staphylococcal superantigen-like protein 9	negative	positive
ssl09/set5_probe 2	ssl09/set5_probe 2		negative	positive
ssl09/set5 (MRSA252)	ssl09/set5 (MRSA252)		positive	negative
ssl10/set4	ssl10/set4	staphylococcal superantigen-like protein 10	ambiguous	positive
ssl10 (RF122)	ssl10 (RF122)		negative	negative
ssl10/set4 (MRSA252)	ssl10/set4 (MRSA252)		positive	negative
ssl11/set2 (COL)	ssl11/set2 (COL)	staphylococcal superantigene-like protein 11	negative	negative
ssl11+set2(Mu50+N315)	ssl11+set2(Mu50+N315)		negative	negative
ssl11+set2(MW2+MSSA476)	ssl11+set2(MW2+MSSA476)		negative	negative
ssl11/set2 (MRSA252)	ssl11/set2 (MRSA252)		negative	negative
setB3	setB3	staphylococcal exotoxin-like protein, second locus	negative	positive
setB3 (MRSA252)	setB3 (MRSA252)		positive	negative
setB2	setB2		negative	positive
setB2 (MRSA252)	setB2 (MRSA252)		ambiguous	negative
setB1	setB1		ambiguous	positive
cap1 (total)	cap1 (total)	Capsule type 1	negative	negative
capH1	capH1	capsular polysaccharide synthesis enzyme	negative	negative
capJ1	capJ1	O-antigen polymerase	negative	negative
capK1	capK1	capsular polysaccharide biosynthesis protein	negative	negative
cap5 (total)	cap5 (total)	Capsule type 5	negative	positive
capH5	capH5	capsular polysaccharide synthesis enzyme	negative	positive
capJ5	capJ5	O-antigen polymerase	negative	positive
capK5	capK5	capsular polysaccharide biosynthesis protein	negative	positive
cap8 (total)	cap8 (total)	Capsule type 8	positive	negative
capH8	capH8	capsular polysaccharide synthesis enzyme	positive	negative
capI8	capI8	capsular polysaccharide biosynthesis protein	positive	negative
capJ8	capJ8	O-antigen polymerase	positive	negative
capK8	capK8	capsular polysaccharide biosynthesis protein	positive	negative
icaA	icaA	intercellular adhesion protein A	positive	positive
icaC	icaC	intercellular adhesion protein C	positive	positive
icaD	icaD	biofilm PIA synthesis protein D	positive	positive
bap	bap	surface protein involved in biofilm formation	negative	negative
bbp (total)	bbp (total)	bone sialoprotein-binding protein	negative	positive
bbp (consensus)	bbp (consensus)		negative	positive
bbp (COL+MW2)	bbp (COL+MW2)		negative	negative
bbp (MRSA252)	bbp (MRSA252)		negative	negative
bbp (Mu50)	bbp (Mu50)		negative	positive
bbp (RF122)	bbp (RF122)		negative	negative
bbp (ST45)	bbp (ST45)		negative	negative
clfA (total)	clfA (total)	clumping factor A	positive	positive
clfA (consensus)	clfA (consensus)		positive	positive
clfA (COL+RF122)	clfA (COL+RF122)		negative	negative
clfA (MRSA252)	clfA (MRSA252)		negative	negative
clfA (Mu50+MW2)	clfA (Mu50+MW2)		positive	positive
clfB (total)	clfB (total)	clumping factor B	positive	negative
clfB (consensus)	clfB (consensus)		positive	negative
clfB (COL+Mu50)	clfB (COL+Mu50)		negative	negative
clfB (MW2)	clfB (MW2)		positive	negative
clfB (RF122)	clfB (RF122)		ambiguous	negative
cna	cna	collagen-binding adhesin	positive	negative
ebh (consensus)	ebh (consensus)	cell wall associated fibronectin-binding protein	positive	positive
ebpS (total)	ebpS (total)	cell surface elastin binding protein	positive	positive
ebpS_probe 612	ebpS_probe 612		negative	positive
ebpS_probe 614	ebpS_probe 614		positive	positive
ebpS (01-1111)	ebpS (01-1111)		positive	negative
ebpS (COL)	ebpS (COL)		negative	negative
eno	eno	enolase	positive	positive
fib	fib	fibrinogen binding protein (19 kDa)	negative	positive
fib (MRSA252)	fib (MRSA252)		positive	negative
fnbA (total)	fnbA (total)	fibronectin-binding protein A	positive	positive
fnbA (consensus)	fnbA (consensus)		positive	positive
fnbA (COL)	fnbA (COL)		negative	negative
fnbA (MRSA252)	fnbA (MRSA252)		negative	positive
fnbA (Mu50+MW2)	fnbA (Mu50+MW2)		positive	negative
fnbA (RF122)	fnbA (RF122)		negative	negative
fnbB (total)	fnbB (total)	fibronectin-binding protein B	positive	positive
fnbB (COL)	fnbB (COL)		negative	negative
fnbB (COL+Mu50+MW2)	fnbB (COL+Mu50+MW2)		negative	positive
fnbB (Mu50)	fnbB (Mu50)		negative	ambiguous
fnbB (MW2)	fnbB (MW2)		positive	negative
fnbB (ST15)	fnbB (ST15)		negative	negative
fnbB (ST45-2)	fnbB (ST45-2)		negative	negative
map (total)	map (total)	major histocompatibility complex class II analog protein (=Extracellular adherence protein, eap)	positive	positive
map (COL)	map (COL)		negative	positive
map (MRSA252)	map (MRSA252)		positive	negative
map (Mu50+MW2)	map (Mu50+MW2)		negative	positive
sasG (total)	sasG (total)	Staphylococcus aureus surface protein G	negative	negative
sasG (COL+Mu50)	sasG (COL+Mu50)		negative	negative
sasG (MW2)	sasG (MW2)		negative	negative
sasG (other than MRSA252+RF122)	sasG (other than MRSA252+RF122)		negative	negative
sdrC (total)	sdrC (total)	Ser-Asp rich fibrinogen-/bone sialoprotein-binding protein C	positive	positive
sdrC (consensus)	sdrC (consensus)		positive	positive
sdrC (B1)	sdrC (B1)		positive	negative
sdrC (COL)	sdrC (COL)		negative	negative
sdrC (Mu50)	sdrC (Mu50)		negative	positive
sdrC (MW2+MRSA252+RF122)	sdrC (MW2+MRSA252+RF122)		negative	ambiguous
sdrC (other than MRSA252+RF122)	sdrC (other than MRSA252+RF122)		negative	positive
sdrD (total)	sdrD (total)	Ser-Asp rich fibrinogen-/bone sialoprotein-binding protein D	positive	positive
sdrD (consensus)	sdrD (consensus)		positive	positive
sdrD (COL+MW2)	sdrD (COL+MW2)		positive	negative
sdrD (Mu50)	sdrD (Mu50)		negative	negative
sdrD (other)	sdrD (other)		negative	positive
vwb (total)	vwb (total)	van Willebrand factor binding protein	positive	positive
vwb (consensus)	vwb (consensus)		negative	positive
vwb (COL+MW2)	vwb (COL+MW2)		negative	negative
vwb (MRSA252)	vwb (MRSA252)		positive	positive
vwb (Mu50)	vwb (Mu50)		negative	negative
vwb (RF122)	vwb (RF122)		negative	negative
isaB	isaB	immunodominant antigen B	negative	positive
isaB (MRSA252)	isaB (MRSA252)		positive	ambiguous
mprF (COL+MW2)	mprF (COL+MW2)	defensin resistance gene protein	negative	ambiguous
mprF (Mu50+MRSA252)	mprF (Mu50+MRSA252)		positive	positive
isdA (consensus)	isdA (consensus)	transferrin-binding protein	positive	positive
isdA (MRSA252)	isdA (MRSA252)		positive	negative
isdA (other than MRSA252 )	isdA (other than MRSA252 )		negative	positive
lmrP (other than RF122)_probe1	lmrP (other than RF122)_probe1	hypothetical protein, similar to integral membrane protein LmrP	positive	positive
lmrP (other than RF122)_probe2	lmrP (other than RF122)_probe2		positive	positive
lmrP (RF122)_probe1	lmrP (RF122)_probe1		negative	negative
lmrP (RF122)_probe2	lmrP (RF122)_probe2		negative	negative
hsdS1 (RF122)	hsdS1 (RF122)	type I site-specific deoxyribonuclease subunit, 1st locus	negative	negative
hsdS2 (Mu50+N315+COL+USA300+NCTC8325)	hsdS2 (Mu50+N315+COL+USA300+NCTC8325)	type I site-specific deoxyribonuclease subunit, 2nd locus	negative	negative
hsdS2 (MW2+MSSA476)	hsdS2 (MW2+MSSA476)		positive	positive
hsdS2 (RF122)	hsdS2 (RF122)		negative	negative
hsdS2 (MRSA252)	hsdS2 (MRSA252)		positive	negative
hsdS3 (all other than RF122+ MRSA252)	hsdS3 (all other than RF122+ MRSA252)	type I site-specific deoxyribonuclease subunit, 3rd locus	negative	negative
hsdS3 (COL+USA300+NCTC8325+MW2+MSSA476+RF122)	hsdS3 (COL+USA300+NCTC8325+MW2+MSSA476+RF122)		negative	negative
hsdS3 (Mu50+N315)	hsdS3 (Mu50+N315)		negative	negative
hsdS3 (CC51+ MRSA252)	hsdS3 (CC51+ MRSA252)		negative	negative
hsdS3 (MRSA252)	hsdS3 (MRSA252)		negative	negative
hsdSx (CC25)	hsdSx (CC25)	type I site-specific deoxyribonuclease subunit, unknown locus	negative	negative
hsdSx (CC15)	hsdSx (CC15)		negative	negative
hsdSx (etd)	hsdSx (etd)		positive	ambiguous
Q2FXC0	Q2FXC0	hypothetical protein, located next to serine protease operon	negative	negative
Q2YUB3	Q2YUB3	Unspecific efflux/transporter	ambiguous	negative
Q7A4X2	Q7A4X2	hypothetical protein	positive	positive
hysA1 (MRSA252)	hysA1 (MRSA252)	hyaluronate lyase, first / second locus	negative	negative
hysA1 (MRSA252+RF122) and/or hysA2 (consensus)	hysA1 (MRSA252+RF122) and/or hysA2 (consensus)		positive	positive
hysA1 (MRSA252+RF122) and/or hysA2 (COL+USA300)	hysA1 (MRSA252+RF122) and/or hysA2 (COL+USA300)		negative	negative
hysA2 (all other than MRSA252)	hysA2 (all other than MRSA252)	hyaluronate lyase, second locus	negative	negative
hysA2 (COL+USA300+NCTC8325)	hysA2 (COL+USA300+NCTC8325)		negative	negative
hysA2 (all other than COL+USA300+NCTC8325)_probe1	hysA2 (all other than COL+USA300+NCTC8325)_probe1		negative	positive
hysA2 (MRSA252)	hysA2 (MRSA252)		negative	negative
